# Supplementary material
Source: publisher site journal article supplement (https://www.spandidos-publications.com/5951/downloadSupplementary)

Figure S1. Inhibition of cell metastasis by the IC10 concentration of UA in colon cancer cells. (A) The migration and invasion of HCT-116 cells treated with or without UA (10  $\mu$ mol/l) for 48 h after overexpressing ARL4C. (B) The migration and invasion of SW480 cells treated with or without UA (5  $\mu$ mol/l) for 48 h after overexpressing ARL4C. \*P<0.05 and \*\*P<0.01 vs. the control group. UA, ursolic acid; ARL4C, ADP-ribosylation factor like-4C; NC, negative control; OE, overexpression.

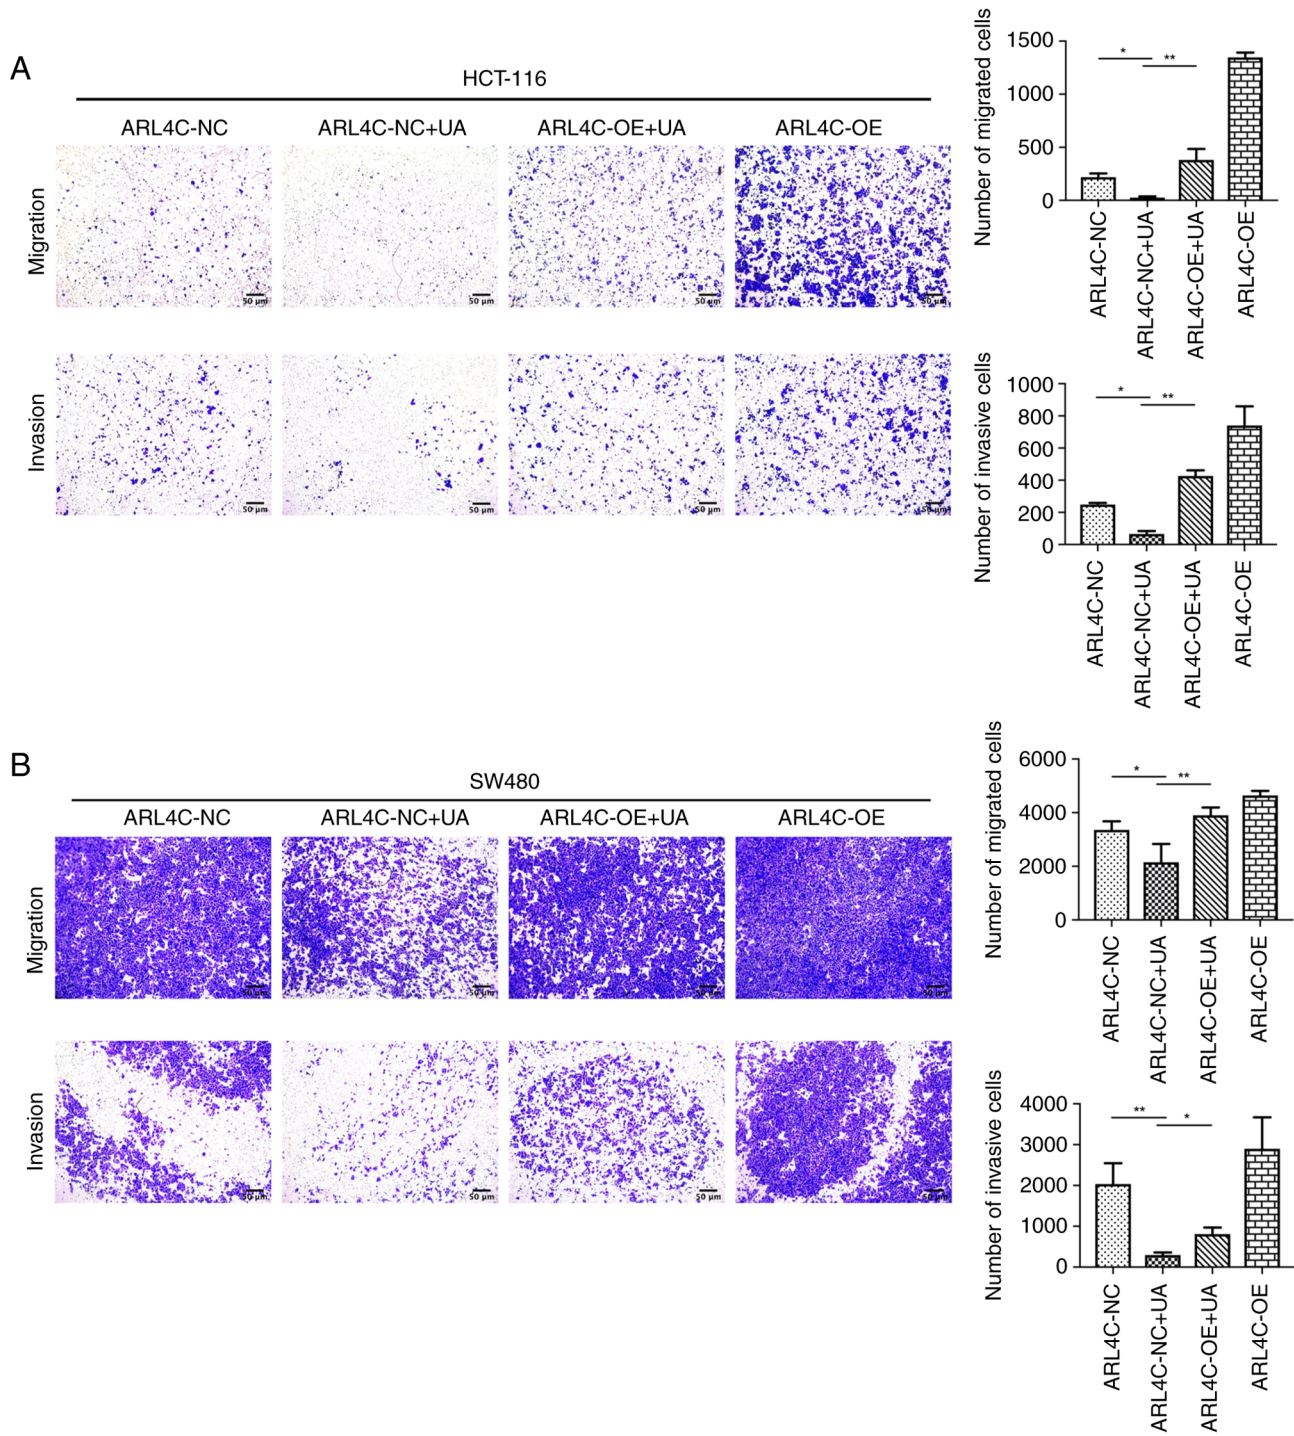

Supplement: Supplementary file 1 [file downloadSupplementary]
